# Supplementary material for: The interplay of crystallization kinetics and morphology during the formation of SnO2 nanorods: snapshots of the crystallization from fast microwave reactions
Source: Royal Society of Chemistry journal article supplement (doi:10.1039/c0ce00573h), 2011-01-01
Supplement: c0ce00573h.pdf [file c0ce00573h.pdf]

## Supplementary Data

# The Interplay of Crystallization Kinetics and Morphology during the Formation of SnO<sub>2</sub> Nanorods: Snapshots of the Crystallization from fast Microwave Reactions

*Alexander Birkel<sup>1</sup>, Frank Reuter<sup>1</sup>, Dominik Koll<sup>1</sup>, Stefan Frank<sup>1</sup>,  
Robert Branscheid<sup>2</sup>, Martin Panthöfer<sup>1</sup>, Eva Rentschler<sup>1</sup> and Wolfgang Tremel<sup>1</sup>*

<sup>1</sup>Institut für Anorganische Chemie und Analytische Chemie

Johannes Gutenberg - Universität

Duesbergweg 10-14

55099 Mainz

<sup>2</sup>**Elektronenmikroskopie-Zentrum Mainz**

Institut für Physikalische Chemie

Johannes Gutenberg - Universität

Jakob-Welder-Weg 11

55099 Mainz

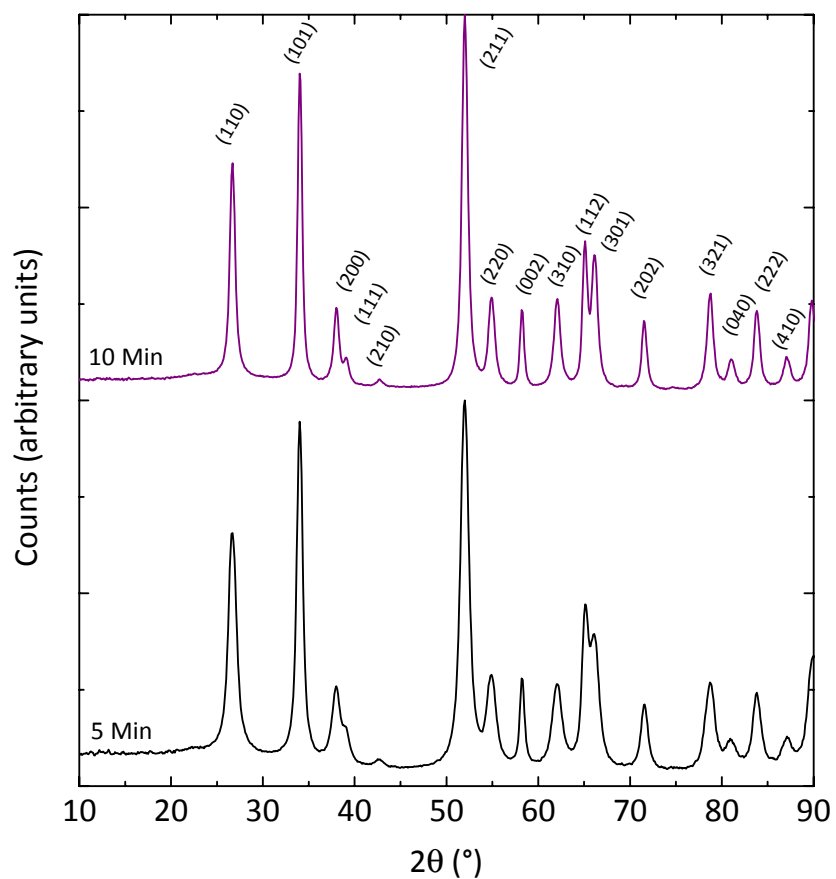

**Fig. S1:** X-Ray diffraction pattern of the samples prepared with 1 minute heating ramp.

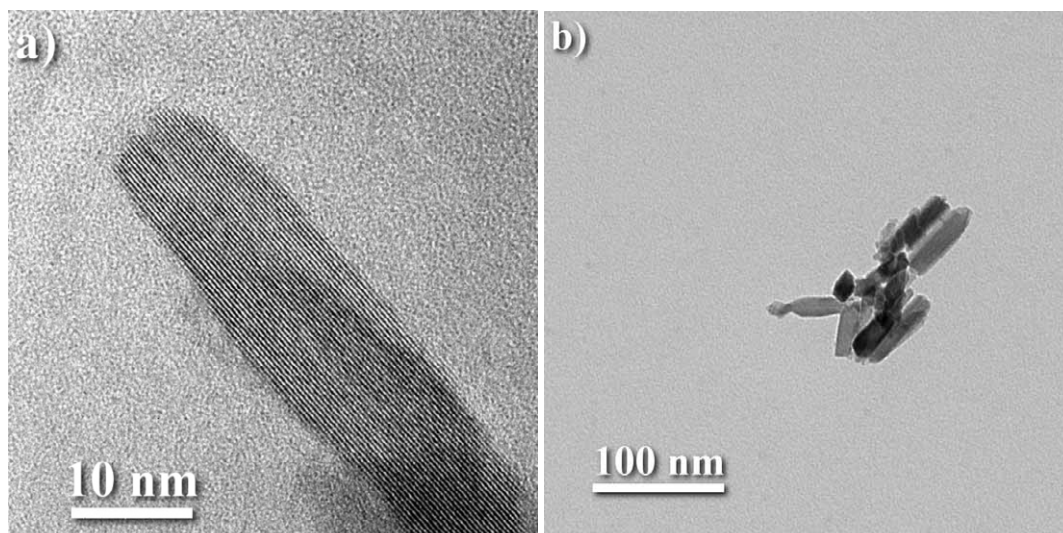

**Fig. S2:** a) High resolution TEM image of a single SnO<sub>2</sub> nanorod. b) Bundle of SnO<sub>2</sub> nanorods, obtained after 6 minutes of reaction time.

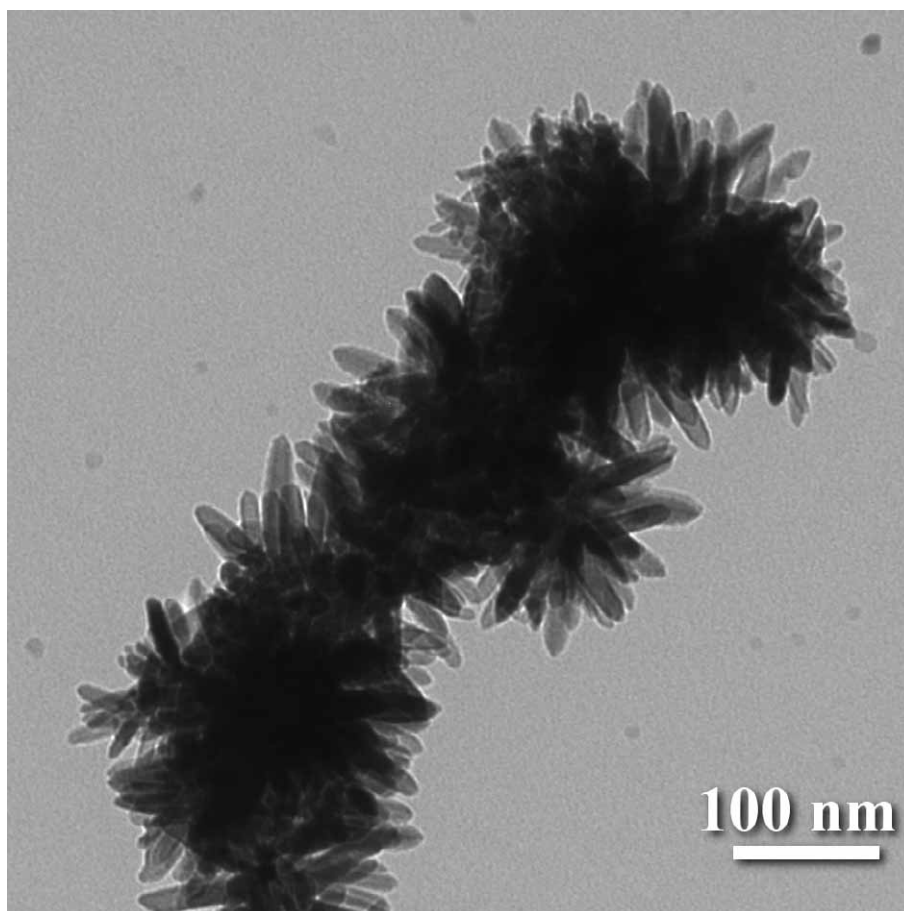

**Fig. S3:** TEM image of the sample heated for 11 minutes.

**Table S1.** Calculated crystallite sizes of the samples heated for various times at 46 bar (uncertainties correspond to the threefold of the estimated standard deviations (e.s.d.) from refinement.)

| Heating time /min | CS (short) /nm   | CS (long) /nm     |
|-------------------|------------------|-------------------|
| 0                 | $3.37 \pm 0.02$  | $3.37 \pm 0.02$   |
| 1                 | $4.07 \pm 0.04$  | $4.07 \pm 0.04$   |
| 2.5               | $3.95 \pm 0.04$  | $8.68 \pm 0.21$   |
| 5                 | $4.09 \pm 0.02$  | $9.17 \pm 0.13$   |
| 10                | $4.28 \pm 0.02$  | $10.60 \pm 0.13$  |
| 15                | $15.58 \pm 0.12$ | $36.69 \pm 0.81$  |
| 20                | $16.85 \pm 0.10$ | $39.13 \pm 0.69$  |
| 30                | $17.74 \pm 0.10$ | $47.16 \pm 0.81$  |
| 45                | $37.05 \pm 0.24$ | $77.09 \pm 1.20$  |
| 60                | $48.48 \pm 0.30$ | $110.31 \pm 2.25$ |
| 90                | $54.84 \pm 0.45$ | $160.87 \pm 3.84$ |

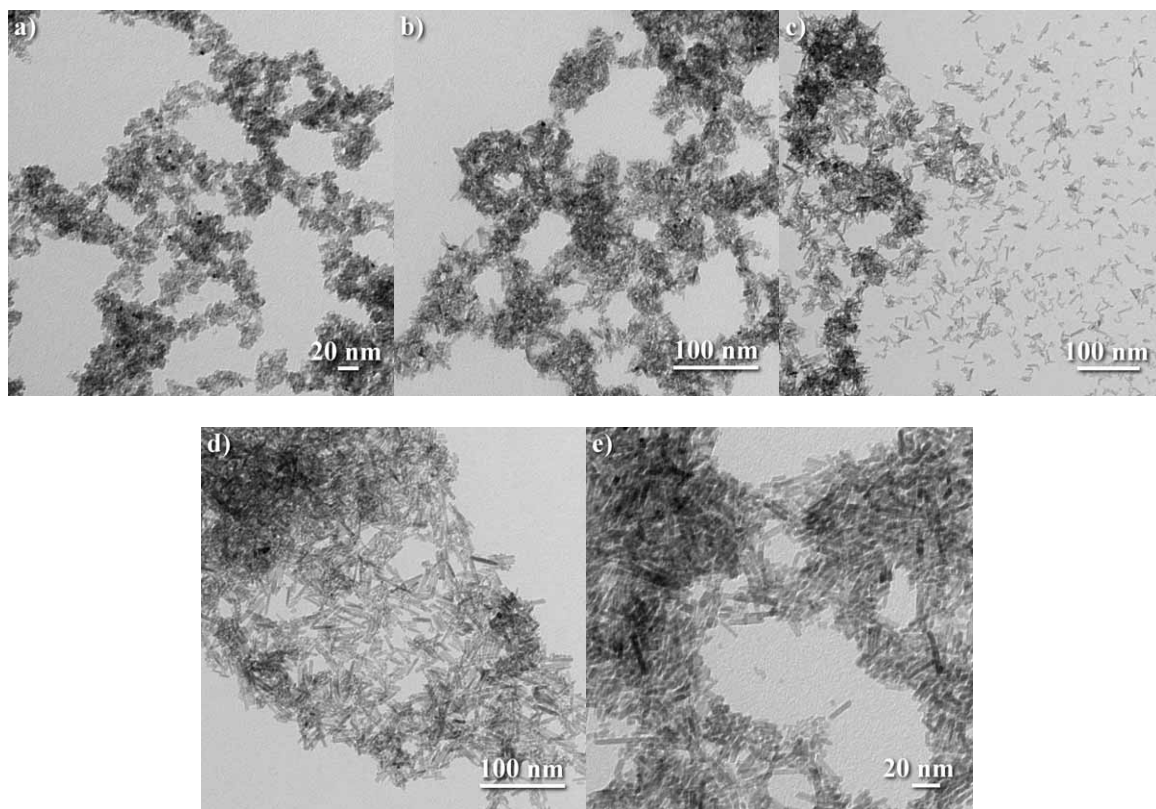

**Fig. S4:** TEM micrographs of the obtained rod-shaped materials. The images correspond to reaction times of 0 (a), 1 (b), 2.5 (c), 5 (d) and 10 min. (e).

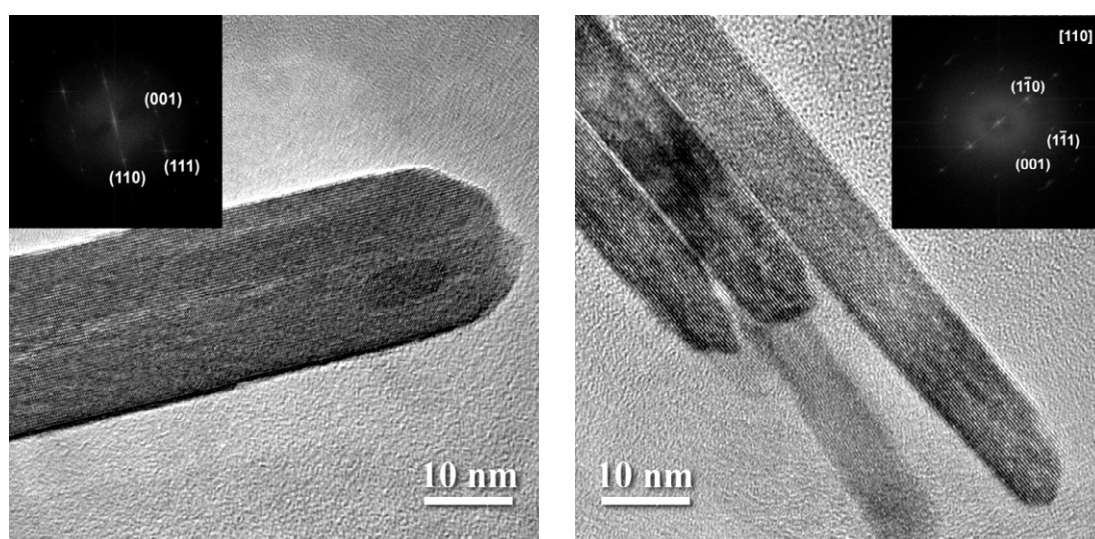

**Fig. S5:** Nanorods after 30 min. (left) and 45 min. (right) insets show Fourier transformation and indexing of the corresponding reciprocal lattice points (cassiterite).



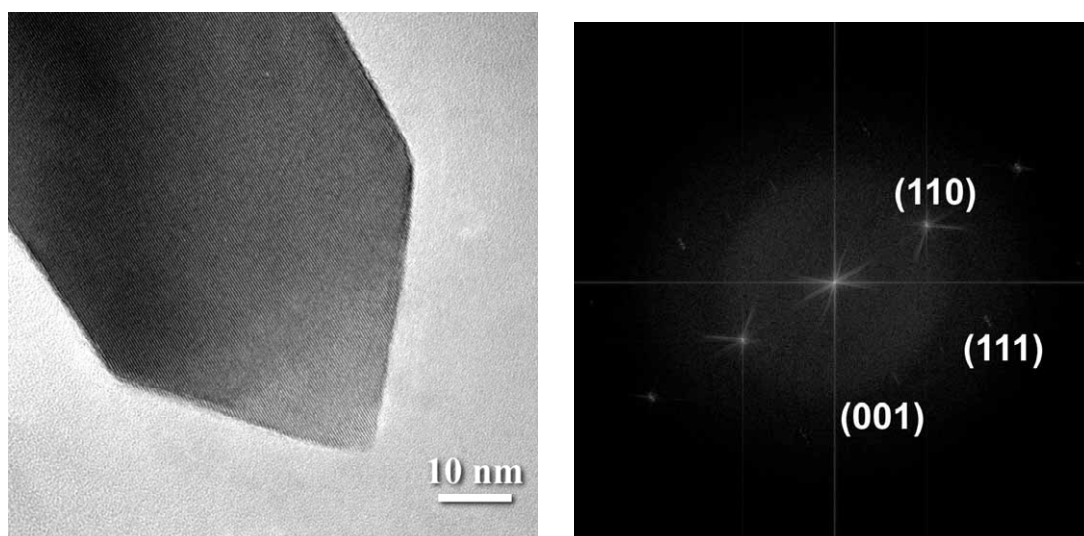

**Fig. S6:** Nanorods after 60 min. (left) and FFT showing the enclosing crystal faces (right)

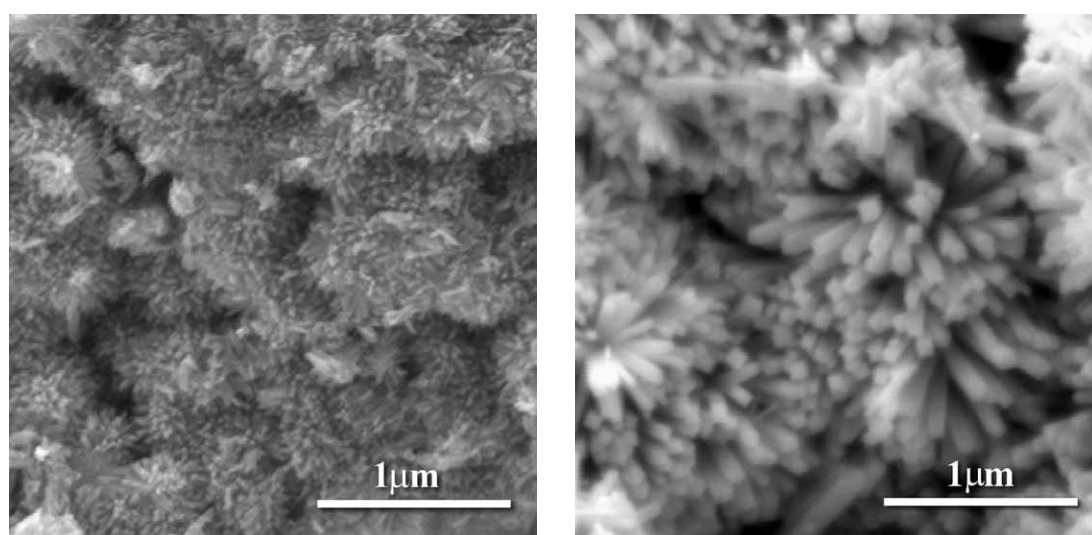

**Fig. S7:** Left: SEM overview pictures of nanorods after 20 min. Right: SEM overview pictures of nanorods after 90 min.

**Table S2:** Exact positions of the various Raman modes observed in the nanostructured SnO<sub>2</sub> samples

| Sample | Raman mode /cm <sup>-1</sup> |                |                 |                 |                 |                 |
|--------|------------------------------|----------------|-----------------|-----------------|-----------------|-----------------|
|        | *                            | E <sub>g</sub> | B <sub>1u</sub> | A <sub>1g</sub> | A <sub>2u</sub> | B <sub>2g</sub> |
| 15 Min | 355                          | 477            | 576             | 628             | 694             | 771             |
| 20 Min | 355                          | 476            | 573             | 628             | 693             | 770             |
| 30 Min | 354                          | 476            | 576             | 628             | 694             | 768             |
| 45 Min | 355                          | 477            | 578             | 629             | 694             | 769             |
| 60 Min | -                            | 477            | -               | 624             | -               | 767             |
| 90 Min | -                            | 471            | -               | 625             | 689             | 767             |

**Table S3:** Exact positions of the various IR-modes observed in the nanostructured SnO<sub>2</sub> samples

| Sample | IR mode /cm <sup>-1</sup> |         |                     |                      |                     |
|--------|---------------------------|---------|---------------------|----------------------|---------------------|
|        | A <sub>2u</sub> (TO)      | surface | E <sub>u</sub> (TO) | A <sub>2u</sub> (LO) | E <sub>u</sub> (LO) |
| 15 Min | 496                       | 515     | 641                 | -                    | -                   |
| 20 Min | 506                       | -       | 649                 | -                    | -                   |
| 30 Min | 502                       | -       | 652                 | -                    | -                   |
| 45 Min | 491                       | -       | 656                 | 662                  | -                   |
| 60 Min | 490                       | 520     | 630                 | 656                  | 683                 |
| 90 Min | 508                       | 529     | 632                 | 671                  | 690                 |

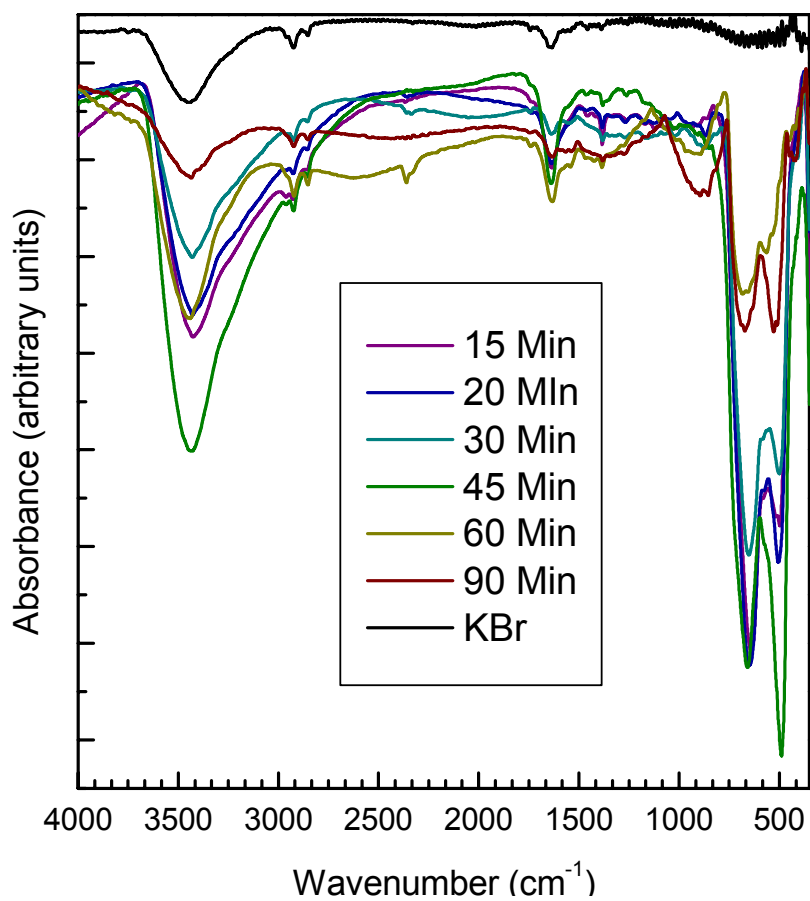

**Fig. S8:** Normalized FT-IR-spectra of the samples prepared at 46 bar
